# Supplementary material for: A photo-assisted rechargeable battery: synergy, compatibility, and stability of a TiO2/dye/Cu2S bifunctional composite electrode
Source: Royal Society of Chemistry journal article supplement (doi:10.1039/c9nr09224b), 2019-12-05
Supplement: c9nr09224b1.pdf [file c9nr09224b1.pdf]

## Supporting Information

### **Photo-assisted Rechargeable Battery: Synergy, Compatibility and Stability of TiO<sub>2</sub>/dye/Cu<sub>2</sub>S Bifunctional Composite Electrode**

Chong Xu, Xu Zhang, Lianfeng Duan\* , Xueyu Zhang, Xuesong Li, Wei Lü\*

#### **Experiments**

##### **Materials**

FTO conductive glasses are purchased from Zhuhai Kaivo Optoelec-tronic Technology Co., Ltd. N719 was purchased from Kunshan Sunlaite Co., Ltd. Pt counter electrodes are purchased from Dalian seven colors solar energy technology Co., Ltd. Acetone, ethanol, ethylene glycol and methanol were purchased from Beijing Chemical Works. CuCl and thiourea were purchased from Shanghai Chemicals. Polyvinylpyrrolidone (PVP), PVDF, Cd(CH<sub>3</sub>COO)<sub>2</sub>·2H<sub>2</sub>O, Na<sub>2</sub>S and NMP were supplied by Aladdin. LiTFSI was obtained from DodoChem Reagent, Suzhou, China. All chemicals were used directly without further purification.

##### **Preparation of electrode materials**

The p25 paste is prepared according to previous work.<sup>1</sup> Briefly, the paste is prepared by mixing ethye cellulose (0.4 g), α-terpinol (3.2 g), and P25 (0.8 g) in ethanol (8.5 ml), followed by stirring.

To synthesis Cu<sub>2</sub>S, a mixed solution including 20 mL alcohol, 20 mL ethylene glycol, 0.25 g CuCl, 0.3 g PVP, and 0.3 g thiourea are prepared and transferred into

an autoclave for heating 12 h at 150 °C. After centrifuging and washing, the product is dried and grinded for later use.

### **Preparation of bifunctional compatible electrodes**

The Cu<sub>2</sub>S based bifunctional electrode for photoelectric conversion and energy storage is made of three steps. Firstly, the mesoporous TiO<sub>2</sub> film is prepared by spin-coating of as-prepared TiO<sub>2</sub> paste on the FTO substrate, followed by drying and sintering at 450°C. Secondly, the TiO<sub>2</sub> film was soaked in N719 included solution for 24 h to prepare dye-sensitized photoanode. Finally, the Cu<sub>2</sub>S paste (8:1:1 of Cu<sub>2</sub>S, PVDF and carbon black in NMP) is deposited on the surface of photoanode by doctor blade method, and followed by drying.

To compare, two reference bifunctional compatible electrodes are fabricated, which are based on photoanode of CdS quantum dot (QD) sensitized solar cells. CdS QDs deposited on the mesoporous TiO<sub>2</sub> film are prepared by successive ion layer absorption and reaction (SILAR) method: the TiO<sub>2</sub> photoanode was alternately dipped into Cd(CH<sub>3</sub>CO<sub>2</sub>)<sub>2</sub> and Na<sub>2</sub>S for 30s/dip for 8 cycles and rinsed with methyl alcohol. Two kinds of methods are used to prepare copper sulfide on CdS sensitized TiO<sub>2</sub> photoanode: (1) The Cu<sub>2</sub>S paste mentioned above is pasted on the surface of CdS sensitized TiO<sub>2</sub> photoanode by doctor blade method. (2) The Cu<sub>x</sub>S was made by SILAR method grown directly on the surface of photoanode according to in-situ grown copper sulfide method.<sup>2</sup> Typically, the photoanode was alternately dipped into

0.06 M CuSO<sub>4</sub> and 0.09 M Na<sub>2</sub>S aqueous solution for 30s/dip and rinsed between every dips.

### **Electrochemical measurements**

The photo-response of integrated device was measured by recording the changing of voltage during light (50s) and dark (50s). It was scanned at the rate of 0.1mV/s with no additional voltage. The galvanostatic charge and discharge were tested at 0.1mA from 1.6 - 3.2V. For the process of photo-response charging, the light source was turned off when the device was charged to 3V. Cyclic voltammetry was measured from 1.5 to 3.4V at a scan rate of 0.5 mV/s in dark. These measurements were recorded by electrochemical workstation. The other galvanostatic charge and discharge with and without illumination were measured by LAND. For comparison to the integrated device, the galvanostatic charge and discharge of alone Cu<sub>2</sub>S as cathode (lithium ion battery) was tested at 0.15 and 0.3C (1 C=337 mA g<sup>-1</sup>). The photo-assisted charge and discharge of integrated device were measured at 0.3C. The range of voltage was set from 1.6 to 3.2V.

### **Characterization**

Morphologies and structures were analyzed by XRD (D-MAX II A X-ray diffractometer) and SEM (S4800, Hitachi). Power conversion efficiency (PCE) is characterized by AM 1.5 solar simulator (Zolix), and the active area of photoanodes and bifunctional compatible electrodes were 0.36 cm<sup>2</sup>. The integrated battery was tested with electrochemical workstation (CHI660e, Shanghai, China) and LAND

(LAND-CT2001A, Wuhan, China) with or without light, and the light source is 150 W Xe lamp (LSP-X150, Zolix).



**Figure S1.** Characterization of materials. The XRD patterns of a) TiO<sub>2</sub> and b) Cu<sub>2</sub>S of the composite electrode.



**Figure S2.** Electrochemical characterizations of of integrated battery. CV of integrated photo-assisted rechargeable battery at the scan rate of 0.5mV/s in dark.



**Figure S3.** Galvanostatic charge/discharge curves at 0.15C and 0.3C for first cycle of lithium ion battery (FTO/Cu<sub>2</sub>S/LiTFSI electrolyte/metallic Li) in dark.



**Figure S4.** Cycling curves for the lithium ion battery at 0.15C and 0.3C in dark.



**Figure S5.** Galvanostatic charge (with illumination)-discharge (without illumination) curves for 10 cycles.

## Reference

- 1 J. R. Jennings, Y. Liu, F. Safari-Alamuti and Q. Wang, *J. Phys. Chem. C*, 2011, **116**, 1556-1562.
- 2 H. Zhang, J. Tong, W. Fang, N. Qian and Q. Zhao, *ACS Appl. Energy Mater.*, 2018, **1**, 1355-1363.
